# Supplementary material for: Photocatalytic and Sonocatalytic Degradation of EDTA and Rhodamine B over Ti0 and Ti@TiO2 Nanoparticles
Source: MDPI journal article supplement (doi:10.3390/catal11080928), 2021-07-30
Supplement: s1 [file s1]

Archive with 1 entries (1 files):
- catalysts-1292296-supplementary.pdf
